# Supplementary material
Source: PubMed Central journal article supplement (PMC4256951)

## **SUPPLEMENTAL MATERIAL**

**Supplemental Tables:**

**Supplemental Table 1: Additional Baseline Characteristics of Heart Transplant**

**Patients, by Racial Group**

|                                               | <b>White</b><br>(n=29,986) | <b>Black</b><br>(n=4,745) | <b>Hispanic</b><br>(n=2,017) | <b>Total</b><br>(n=36,748) | <b>P Value</b> |
|-----------------------------------------------|----------------------------|---------------------------|------------------------------|----------------------------|----------------|
| <b>Recipient BMI (n=36101)</b>                | 25.5<br>(22.7, 28.6)       | 25.5<br>(22.2, 29.3)      | 25.1<br>(22.4, 28.3)         | 25.4<br>(22.7, 28.7)       | 0.01           |
| <b>Donor BMI (n=30052)</b>                    | 24.8<br>(22.1, 28.3)       | 25.1<br>(22.3, 28.4)      | 24.5<br>(21.8, 27.7)         | 24.8<br>(22.1, 28.3)       | <0.001         |
| <b>Donor:Recipient BMI ratio (n=29728)</b>    | 0.97<br>(0.85, 1.13)       | 0.98<br>(0.84, 1.16)      | 0.98<br>(0.85, 1.11)         | 0.97<br>(0.85, 1.13)       | 0.22           |
| <b>Donor: Recipient BMI Ratio</b>             |                            |                           |                              |                            |                |
| <0.75                                         | 2397 (8)                   | 463 (10)                  | 196 (10)                     | 3056 (8)                   | <0.001         |
| >=0.75                                        | 21507 (72)                 | 3613 (76)                 | 1552 (77)                    | 26672 (73)                 |                |
| Missing                                       | 6082 (20)                  | 669 (14)                  | 269 (13)                     | 7020 (19)                  |                |
| <b>Gender Match</b>                           |                            |                           |                              |                            |                |
| <b>M recipient / M donor</b>                  | 18408 (61)                 | 2432 (51)                 | 1127 (56)                    | 21967 (60)                 | <0.001         |
| <b>M recipient / F donor</b>                  | 5640 (19)                  | 659 (14)                  | 402 (20)                     | 6701 (18)                  |                |
| <b>F recipient / M donor</b>                  | 2968 (10)                  | 880 (19)                  | 257 (13)                     | 4105 (11)                  |                |
| <b>F recipient / F donor</b>                  | 2970 (10)                  | 774 (16)                  | 231 (11)                     | 3975 (11)                  |                |
| <b>Donor LV Ejection Fraction % (n=14716)</b> | 60 (55, 65)                | 60 (55, 65)               | 62 (58, 68)                  | 60 (55, 65)                | <0.001         |
| <b>Donor LV Ejection Fraction %</b>           |                            |                           |                              |                            |                |
| <45                                           | 161 (1)                    | 41 (1)                    | 14 (1)                       | 216 (1)                    | <0.001         |
| >=45                                          | 11111 (37)                 | 2340 (49)                 | 1049 (52)                    | 14500 (39)                 |                |
| Missing                                       | 18714 (62)                 | 2364 (50)                 | 954 (47)                     | 22032 (60)                 |                |

Values are summarized as number (percent) or median (25<sup>th</sup>, 75<sup>th</sup> percentile).

**Supplemental Table 2: Multivariable Models Stratified by Racial Groups for  
Longer-Term Graft Loss in 6-Month Survivors**

|                                     | <b>Hazard Ratio</b> | <b>95% CI</b> | <b>P Value</b> |
|-------------------------------------|---------------------|---------------|----------------|
| <b>Model 1: White Recipients</b>    |                     |               |                |
| Era                                 | 0.94                | (0.91, 0.97)  | <0.001         |
| <b>Model 2: Black Recipients</b>    |                     |               |                |
| Era                                 | 1.05                | (0.98, 1.12)  | 0.15           |
| <b>Model 3: Hispanic Recipients</b> |                     |               |                |
| Era                                 | 1.03                | (0.91, 1.16)  | 0.66           |

All 3 models are adjusted for age at transplant, donor age, diagnosis, drug treated hypertension, diabetes, Ventricular Assist Device, Implantable Cardioverter Defibrillator, creatinine, Intra-venous antibiotic treatment < 2 weeks before transplant, and Medicaid insurance

**Supplemental Table 3: Multivariable Models Stratified by Era for Longer-Term Graft Loss in 6-Month Survivors**

|                         | <b>Hazard Ratio</b> | <b>95% CI</b> | <b>P Value</b> |
|-------------------------|---------------------|---------------|----------------|
| <b>Model 1: 1987-92</b> |                     |               |                |
| Black                   | 1.59                | (1.45, 1.75)  | <0.001         |
| Hispanic                | 1.09                | (0.94, 1.28)  | 0.25           |
| <b>Model 2: 1993-96</b> |                     |               |                |
| Black                   | 1.56                | (1.42, 1.73)  | <0.001         |
| Hispanic                | 1.00                | (0.84, 1.19)  | 0.25           |
| <b>Model 3: 1997-00</b> |                     |               |                |
| Black                   | 1.52                | (1.35, 1.70)  | <0.001         |
| Hispanic                | 0.89                | (0.73, 1.08)  | 0.24           |
| <b>Model 4: 2001-04</b> |                     |               |                |
| Black                   | 1.70                | (1.47, 1.96)  | <0.001         |
| Hispanic                | 1.25                | (1.01, 1.55)  | 0.04           |
| <b>Model 5: 2005-08</b> |                     |               |                |
| Black                   | 2.37                | (1.86, 3.02)  | <0.001         |
| Hispanic                | 1.55                | (1.08, 2.22)  | 0.02           |

All 5 models are adjusted for age at transplant, donor age, diagnosis, drug-treated hypertension, diabetes, Ventricular Assist Device, Implantable Cardioverter Defibrillator, creatinine, Intra-venous antibiotic treatment < 2 weeks before transplant, and Medicaid insurance

**Supplemental Figures**

**Supplemental Figure 1: Distribution of Transplant Recipients by Racial Groups in**

**Successive Eras**

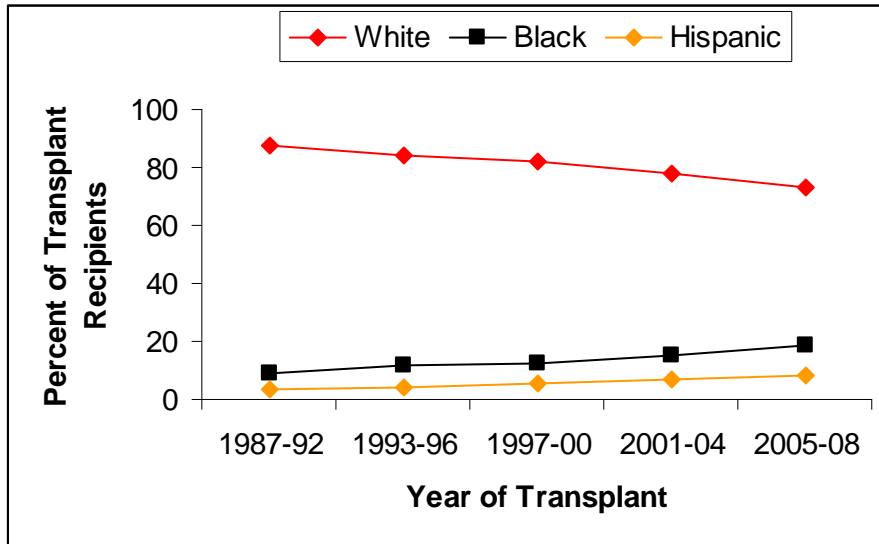

**Supplemental Figure 2: Freedom from Coronary Artery Disease Diagnosis in Racial Groups (P=0.02)**

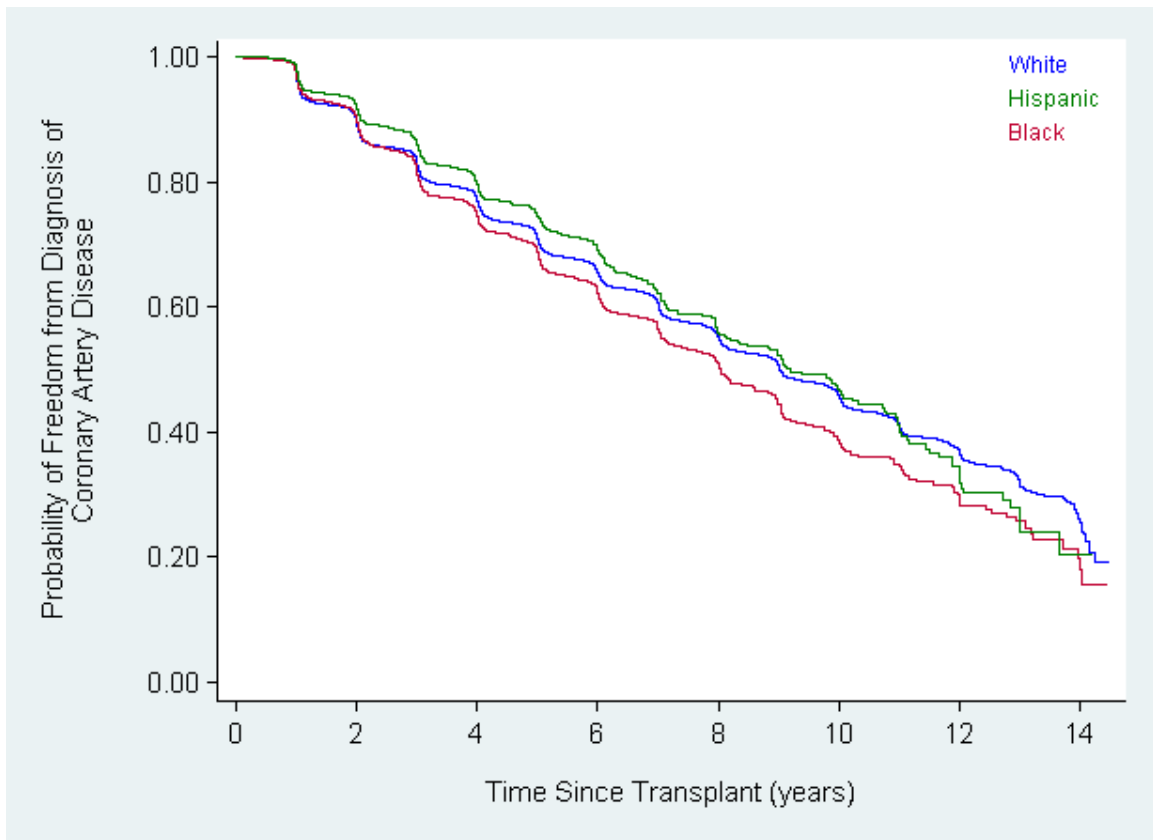

Supplement: NIHMS644726-supplement-Supplemental_material.pdf [file NIHMS644726-supplement-Supplemental_material.pdf]
